# Supplementary material for: Synthesis and structure of an asymmetric copper(i) dimer with two-coordinate and four-coordinate copper(i) sitesElectronic supplementary information (ESI) available: synthesis, NMR, computational details. See http://www.rsc.org/suppdata/cc/b2/b208865g/
Source: Royal Society of Chemistry journal article supplement (doi:10.1039/b208865g), 2002-11-11

---

## Supporting Information

# Synthesis and Structure of an Asymmetric Copper(I) dimer with Two-coordinate and Four-coordinate Copper(I) Sites

Yi Liao, Juan J. Novoa, Atta Arif, and Joel S. Miller

### Synthesis of $\text{Cu}_2(\text{pip})_2$

All manipulations were carried under anaerobic and anhydrous conditions. All the solvents were distilled under nitrogen.

To a mixture of 0.25g (1.35 mmol) of (2-Picolyliminomethyl)pyrrole and 0.15g (2.78 mmol) of NaOMe was added 20 mL of 1:1  $\text{CH}_2\text{Cl}_2/\text{MeCN}$ . The mixture was stirred for 5 hr and added to a suspension of 0.135 g (1.35 mmol) of  $\text{CuCl}$  in 15 mL of MeCN. The resultant mixture was stirred overnight. The insoluble solid was filtered off. The filtrate was concentrated to some sticky oil under reduced pressure. Adding 2 mL of MeCN induced the crystallization of the product. The product was collected as reddish orange crystals by filtration and washed by a little MeCN and diethyl ether, giving a yield of 0.185 g. The crystals suitable for X-ray diffraction study were obtained by slowly evaporating a  $\text{CH}_2\text{Cl}_2$  solution under MeCN atmosphere at 5 °C. This was achieved by sealing a vial of  $\text{CH}_2\text{Cl}_2$  solution in a jar filled with some MeCN.

NMR Spectra for **2**.

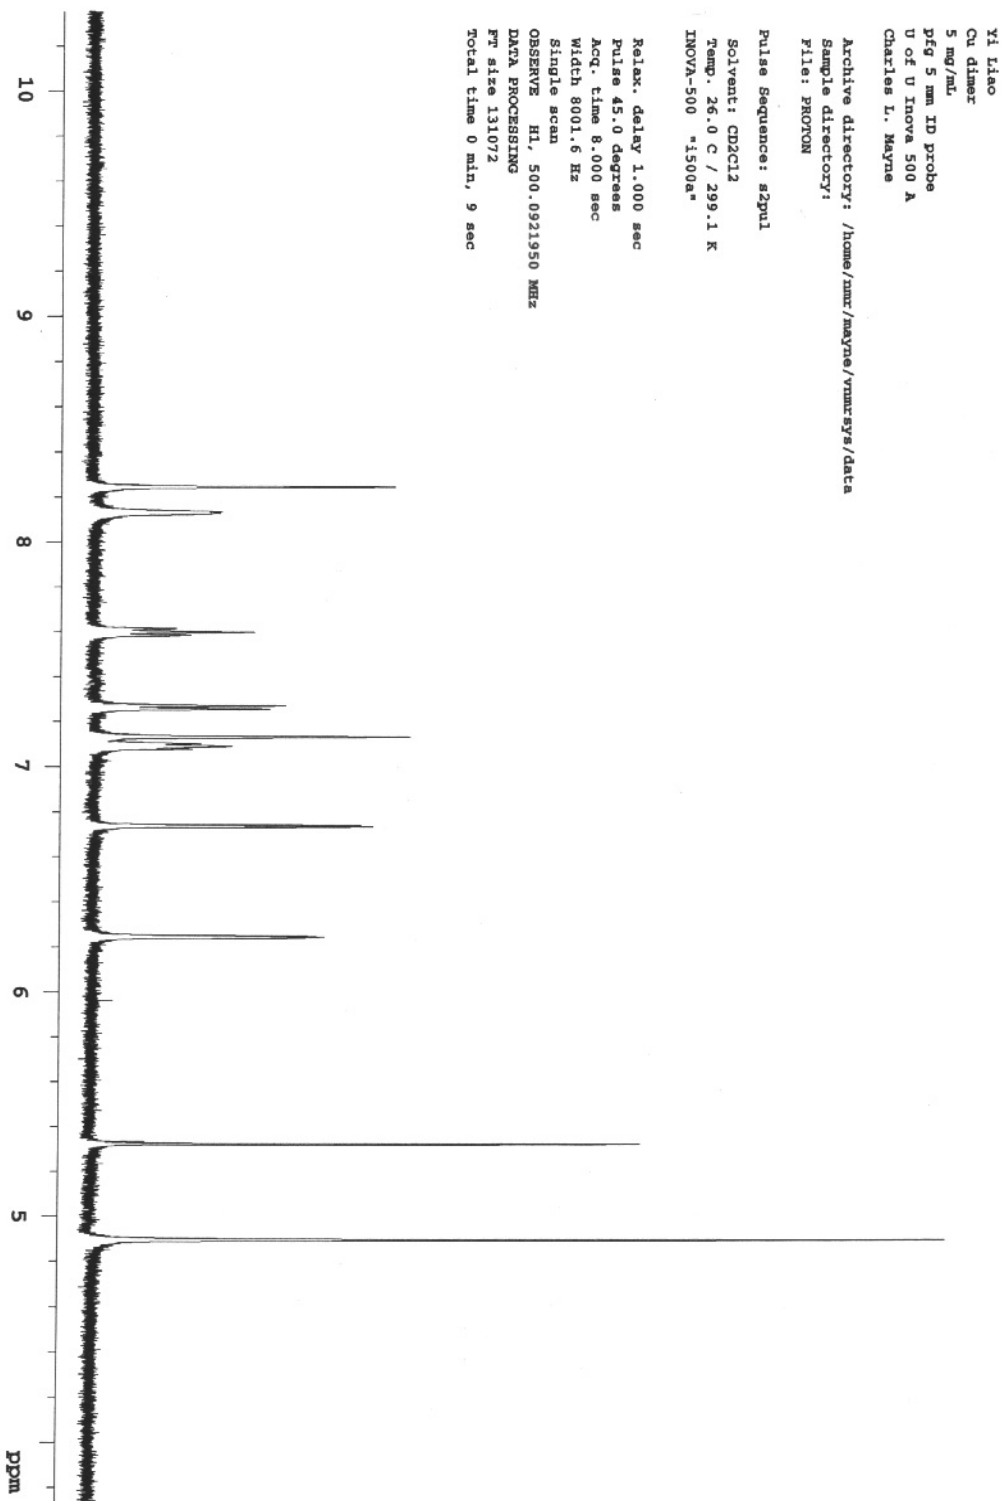

Figure 1  $^1\text{H}$  NMR of  $\text{Cu}_2(\text{pip})_2$  in  $\text{CD}_2\text{Cl}_2$  (5 mg/mL) at  $26^\circ\text{C}$ .

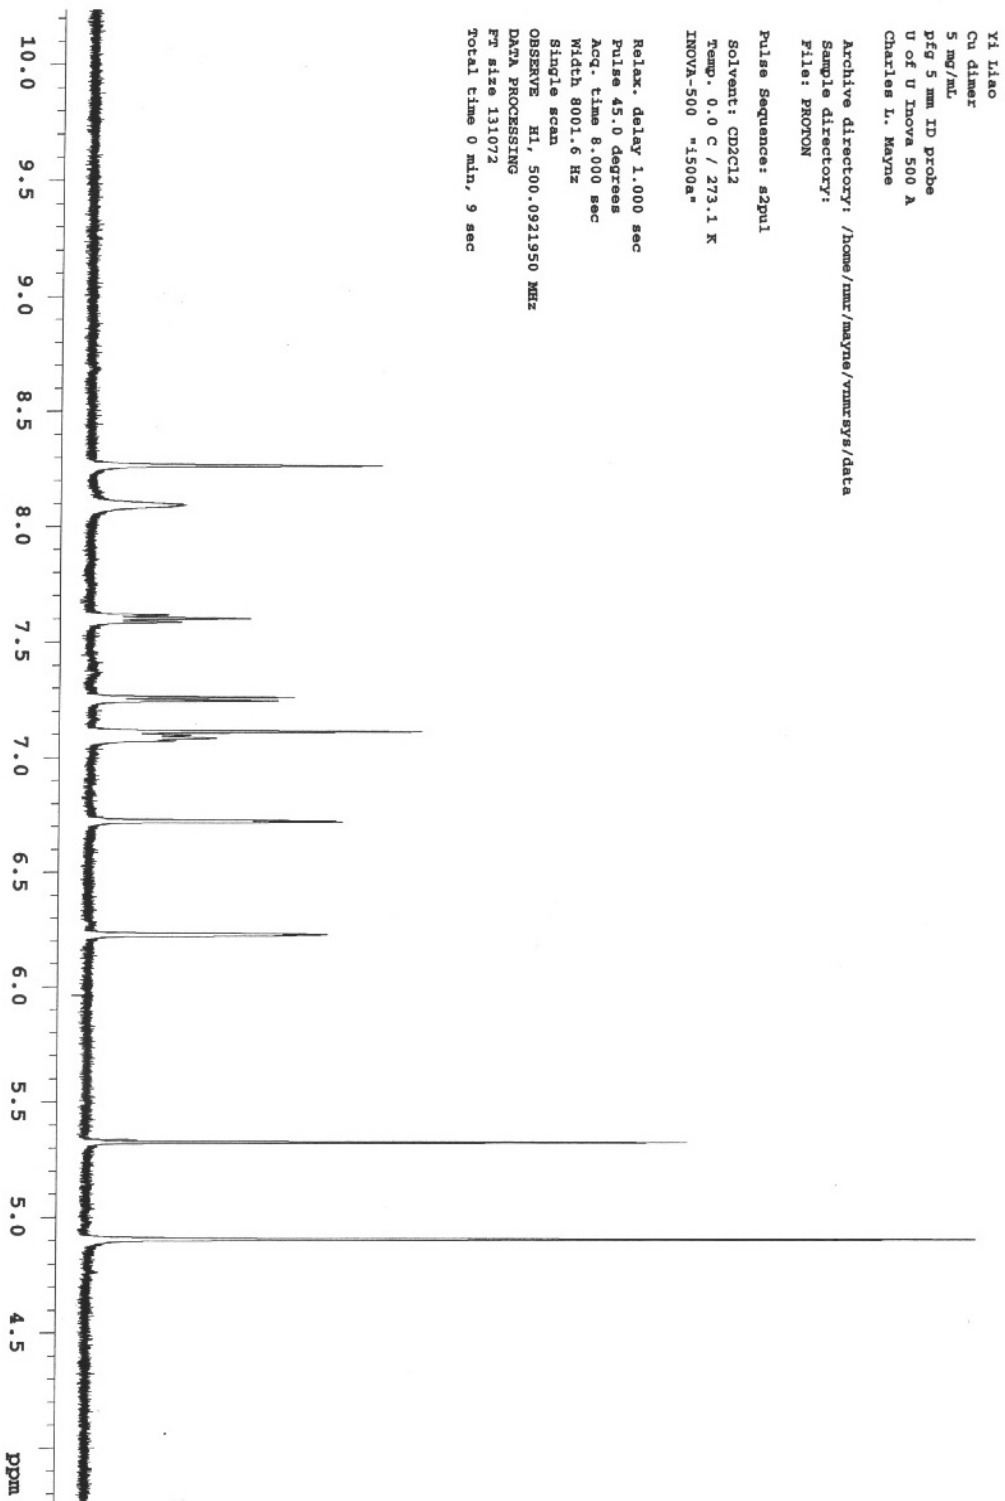

Figure 2  $^1\text{H}$  NMR of  $\text{Cu}_2(\text{pip})_2$  in  $\text{CD}_2\text{Cl}_2$  (5 mg/mL) at  $0^\circ\text{C}$ .

YI Liao  
Cu dimer  
5 mg/mL  
Pfg 5 mm ID probe  
V of V Inova 500 A  
Charles L. Mayne

Archive directory: /home/nmr/mayne/vnmrsys/data  
Sample directory:  
File: PROTON

Pulse Sequence: sfpul

Solvent: CD2Cl2  
Temp. -25.0 C / 248.2 K  
INOVA-500 "1500a"

Relax. delay 1.000 sec  
Pulse 45.0 degrees  
Acq. time 8.000 sec  
Width 8001.6 Hz  
Single scan  
OBSERVE H1, 500.0921950 MHz  
DATA PROCESSING  
F1 size 131072  
Total time 0 min, 9 sec

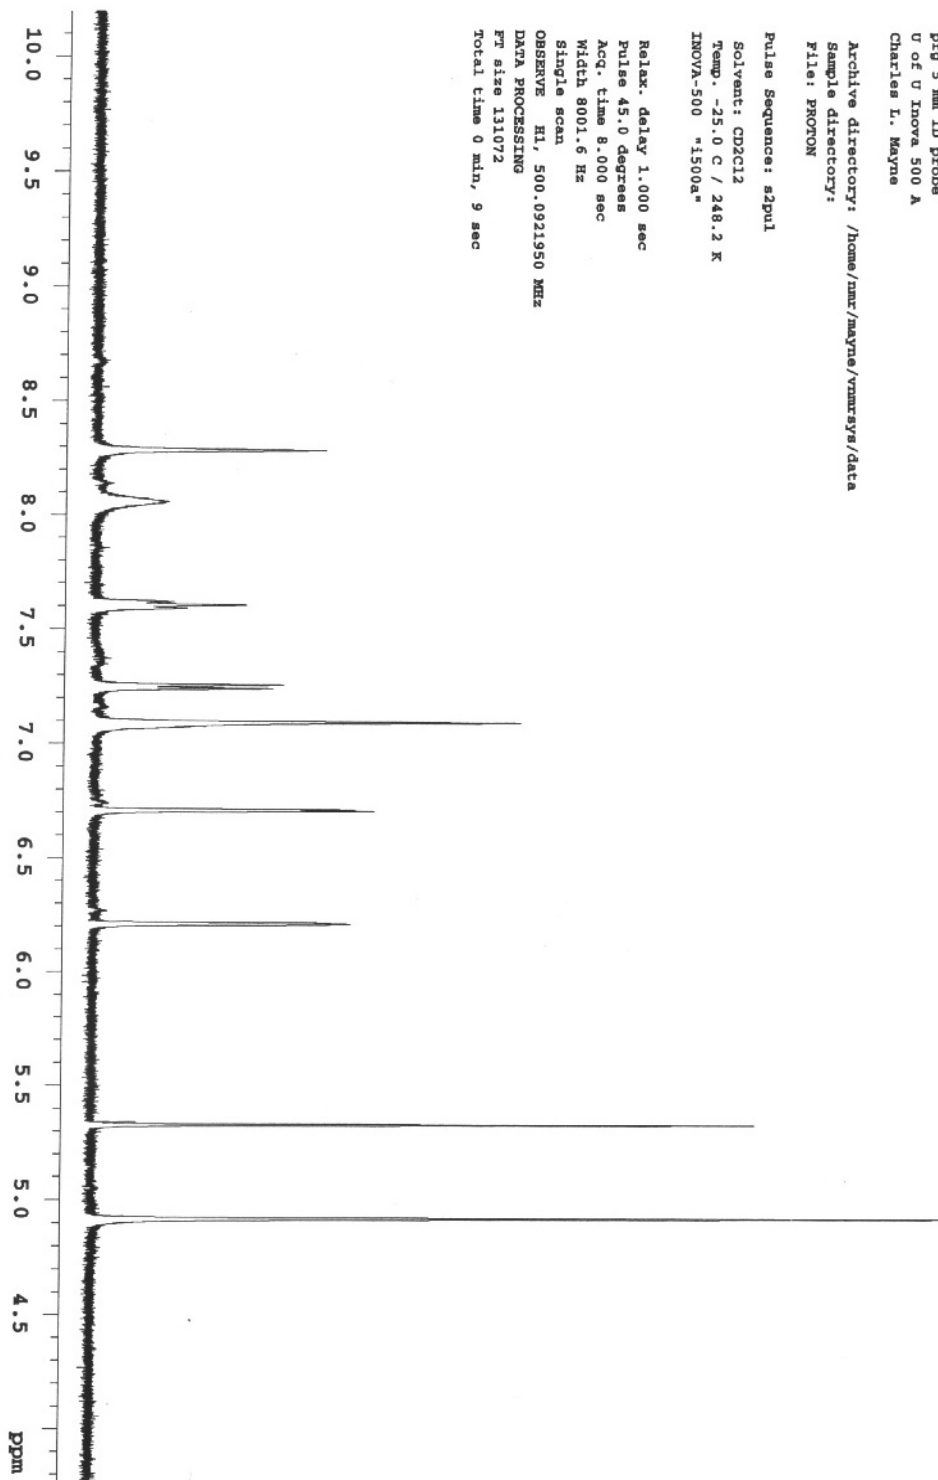

Figure 3 <sup>1</sup>H NMR of Cu<sub>2</sub>(pip)<sub>2</sub> in CD<sub>2</sub>Cl<sub>2</sub> (5 mg/mL) at -25°C.

Yi Liao  
Cu dimer  
20 mg/mL  
pfg 5 mm ID probe  
U of T Inova 500 A  
Charles L. Mayne

Archive directory: /home/nmr/mayne/vnmrsvs/data  
Sample directory:  
File: PROTON

Pulse Sequence: s2pul  
Solvent: CD2Cl2  
Temp: -25.0 C / 248.2 K  
INOVA-500 \*1500a\*

Relax. delay 1.000 sec  
Pulse 45.0 degrees  
Acq. time 8.000 sec  
Width 8001.6 Hz  
Single scan  
OBSERVE H1, 500.0921950 MHz  
DATA PROCESSING  
F2 size 131072  
Total time 0 min, 9 sec

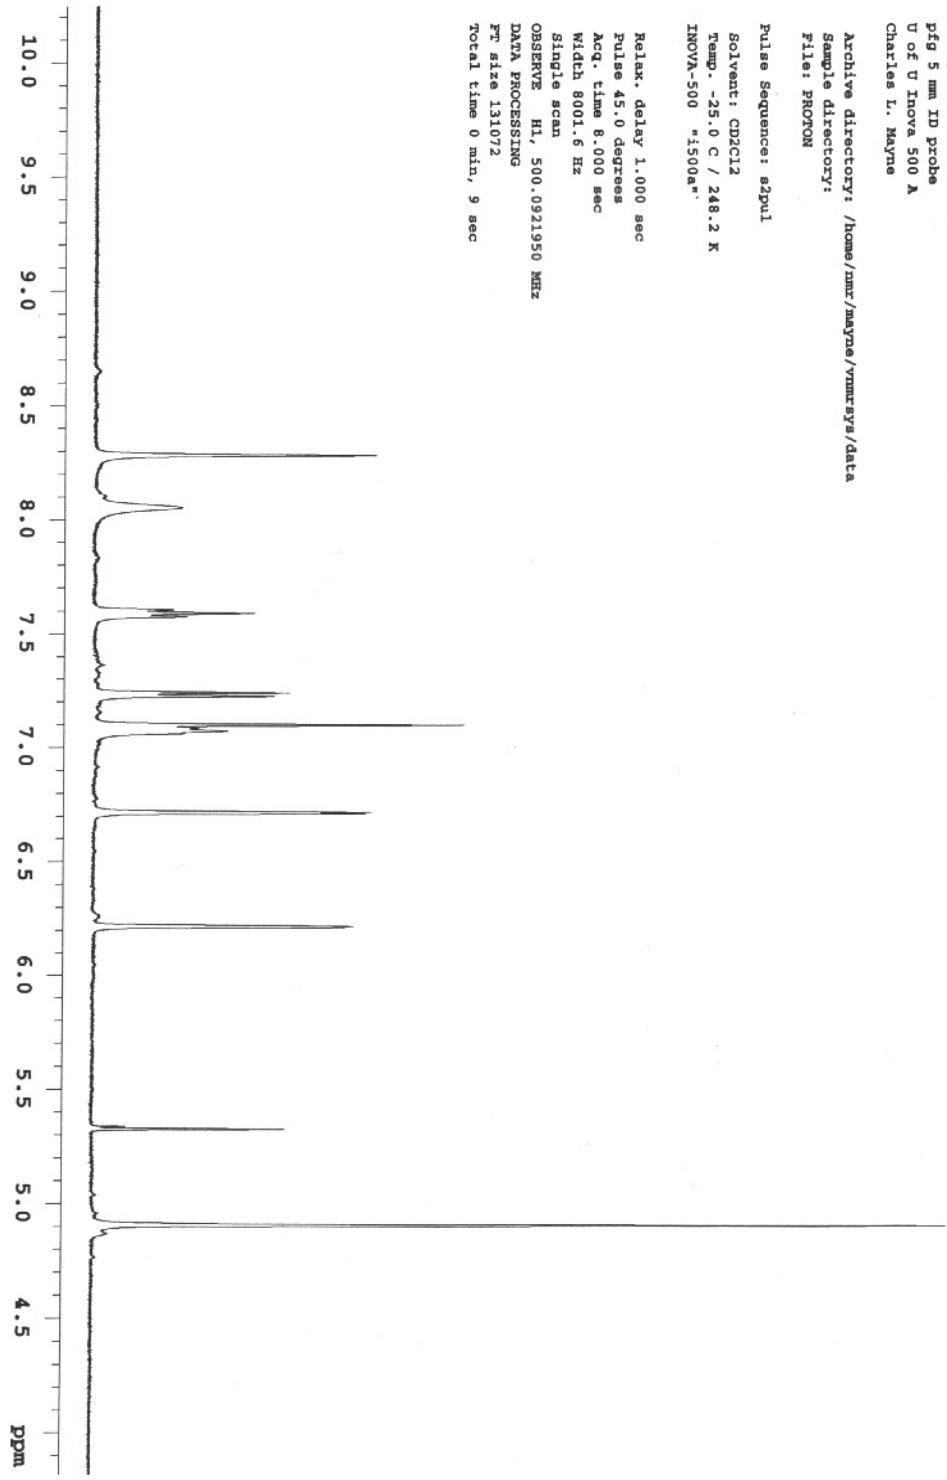

Figure 4  $^1\text{H}$  NMR of  $\text{Cu}_2(\text{pip})_2$  in  $\text{CD}_2\text{Cl}_2$  (20 mg/mL) at  $-25^\circ\text{C}$ .

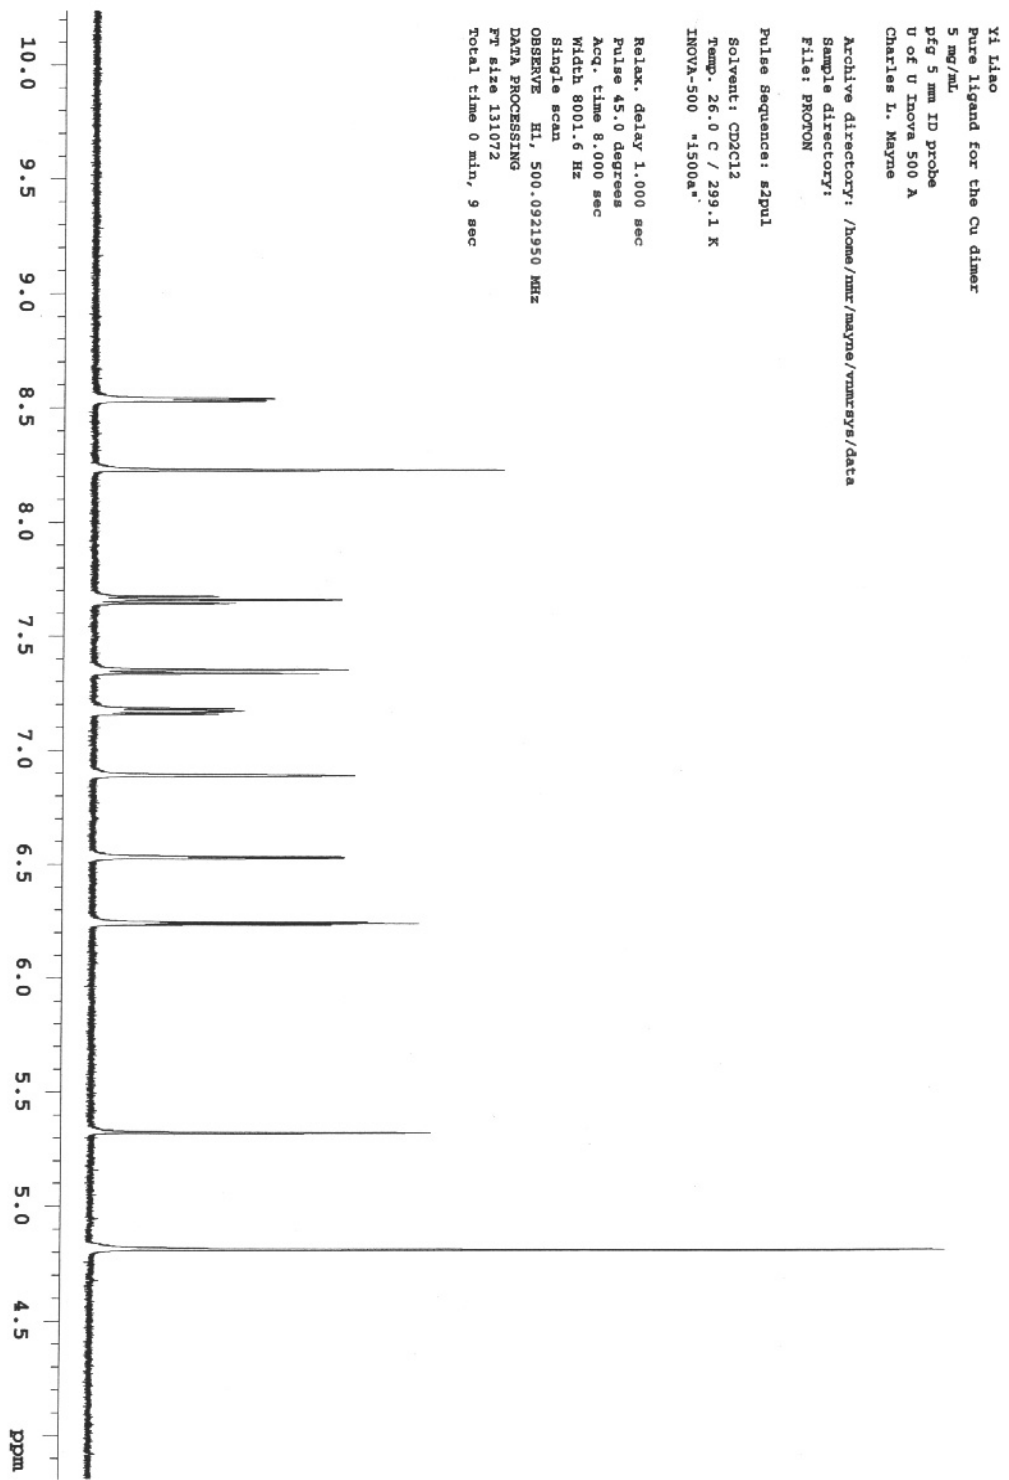

Figure 5  $^1\text{H}$  NMR of (2-picolyliminomethyl)pyrrole in  $\text{CD}_2\text{Cl}_2$  (25 mg/mL) at  $-25^\circ\text{C}$ .

---

**Computational Results for Cu<sup>I</sup><sub>2</sub>(pip)<sub>2</sub> [pip = (2-picolyliminomethyl)pyrrole dianion]**

exptl (cry -1571.10689518 (0.00)  
twisted optimized: -1571.07955175 (17.16 kcal/mol)

exptl.:

=====

```
# b3lyp/lanl2dz guess=read freq
Charge = 0 Multiplicity = 1
6      -3.52657 -1.0313 -1.91182
6      -3.96295 -2.37408 -2.04734
6      -3.19571 -3.13209 -1.13703
6      -2.30022 -2.22794 -0.49408
6      -1.32713 -2.58861  0.48847
6      0.50151 -2.38493  2.02637
6      1.1362  -1.2484  2.81065
6      1.33849 -1.29958  4.20128
6      1.94546 -0.20557  4.84662
6      2.32457  0.91421  4.08272
6      2.08709  0.89245  2.69794
6      -2.35012 3.22074  1.11321
6      -1.83224 4.53256  1.26459
6      -0.57091 4.53427  0.63148
6      -0.35256 3.21534  0.13576
6      0.81838  2.77745 -0.55663
6      2.37674  1.31453 -1.64232
6      2.30058 -0.03104 -2.34452
6      2.81446 -0.24824 -3.63539
6      2.71294 -1.53052 -4.20721
6      2.09042 -2.55839 -3.47425
6      1.59892 -2.26364 -2.19134
29     -1.86909  0.69671 -0.25581
29      0.64496 -0.24134  0.08433
7      -2.52489 -0.93233 -0.97992
7      -0.3327  -1.84035  0.92745
7      1.51313 -0.16669  2.0767
7      -1.46671  2.41932  0.43583
7      1.16024  1.53055 -0.82146
7      1.70827 -1.03119 -1.63771
1      -3.90065 -0.15376 -2.42372
1      -4.73709 -2.73197 -2.71294
1      -3.25191 -4.19968 -0.96005
1      -1.45705 -3.60191  0.89559
1      1.31433 -3.00136  1.60178
1      -0.07486 -3.02828  2.70749
1      1.01805 -2.17122  4.76502
1      2.10516 -0.22124  5.92147
1      2.78075  1.7851  4.54287
1      2.34254  1.73797  2.06641
1      -3.30902  2.84059  1.44195
1      -2.32058  5.36074  1.76058
```

---

|   |         |          |          |
|---|---------|----------|----------|
| 1 | 0.11886 | 5.36539  | 0.54382  |
| 1 | 1.47448 | 3.596    | -0.88673 |
| 1 | 2.52363 | 2.11158  | -2.38599 |
| 1 | 3.2675  | 1.30783  | -0.98844 |
| 1 | 3.27301 | 0.57085  | -4.18226 |
| 1 | 3.09738 | -1.71865 | -5.20614 |
| 1 | 1.97693 | -3.55707 | -3.8842  |
| 1 | 1.09315 | -3.01514 | -1.59256 |

Full point group            C1    NOp 1  
116 alpha electrons    116 beta electrons

SCF Done: E(RB+HF-LYP) = -1571.10689518    A.U. after 3 cycles  
  Conv = 0.4783D-08            -V/T = 2.1013  
  S\*\*2 = 0.0000

Total atomic charges:

|       |           |
|-------|-----------|
| 1     |           |
| 1 C   | -0.202442 |
| 2 C   | -0.305498 |
| 3 C   | -0.385429 |
| 4 C   | 0.326884  |
| 5 C   | -0.255873 |
| 6 C   | -0.436670 |
| 7 C   | 0.301128  |
| 8 C   | -0.331327 |
| 9 C   | -0.173445 |
| 10 C  | -0.178533 |
| 11 C  | -0.243865 |
| 12 C  | -0.202612 |
| 13 C  | -0.305492 |
| 14 C  | -0.385563 |
| 15 C  | 0.326900  |
| 16 C  | -0.255160 |
| 17 C  | -0.436847 |
| 18 C  | 0.300577  |
| 19 C  | -0.330608 |
| 20 C  | -0.173599 |
| 21 C  | -0.178642 |
| 22 C  | -0.243116 |
| 23 Cu | 0.332806  |
| 24 Cu | 0.371982  |
| 25 N  | -0.376652 |
| 26 N  | -0.206381 |
| 27 N  | -0.159436 |
| 28 N  | -0.376654 |
| 29 N  | -0.205995 |
| 30 N  | -0.160666 |
| 31 H  | 0.222203  |
| 32 H  | 0.231445  |
| 33 H  | 0.230966  |
| 34 H  | 0.205294  |



35 H 0.228088  
 36 H 0.208191  
 37 H 0.236255  
 38 H 0.236753  
 39 H 0.232832  
 40 H 0.242840  
 41 H 0.222276  
 42 H 0.231464  
 43 H 0.231013  
 44 H 0.205162  
 45 H 0.208942  
 46 H 0.228162  
 47 H 0.236215  
 48 H 0.236775  
 49 H 0.232841  
 50 H 0.242512

Sum of Mulliken charges= 0.00000

freqs:

Low frequencies --- -3.6571 -2.7924 -0.0007 0.0005 0.0009 2.9829

Low frequencies --- 14.6734 15.6397 19.7287

Harmonic frequencies (cm<sup>-1</sup>), IR intensities (KM/Mole),

Raman scattering activities (A<sup>4</sup>/AMU), Raman depolarization ratios,

reduced masses (AMU), force constants (mDyne/A) and normal coordinates:

|                | 1        | 2        | 3        |
|----------------|----------|----------|----------|
|                | ?A       | ?A       | ?A       |
| Frequencies -- | 14.5176  | 15.6161  | 19.6326  |
| Red. masses -- | 5.5759   | 5.9108   | 4.9830   |
| Frc consts --  | 0.0007   | 0.0008   | 0.0011   |
| IR Inten --    | 0.2423   | 1.1444   | 1.0596   |
|                | 4        | 5        | 6        |
|                | ?A       | ?A       | ?A       |
| Frequencies -- | 34.1889  | 48.4966  | 59.4479  |
| Red. masses -- | 4.8600   | 6.5435   | 4.5844   |
| Frc consts --  | 0.0033   | 0.0091   | 0.0095   |
| IR Inten --    | 0.2862   | 0.2663   | 0.3597   |
|                | 7        | 8        | 9        |
|                | ?A       | ?A       | ?A       |
| Frequencies -- | 72.5546  | 75.1845  | 80.1475  |
| Red. masses -- | 5.0049   | 6.5648   | 5.5372   |
| Frc consts --  | 0.0155   | 0.0219   | 0.0210   |
| IR Inten --    | 0.1448   | 0.3484   | 0.3587   |
|                | 10       | 11       | 12       |
|                | ?A       | ?A       | ?A       |
| Frequencies -- | 85.7522  | 101.4359 | 112.0140 |
| Red. masses -- | 4.8421   | 5.2616   | 12.2600  |
| Frc consts --  | 0.0210   | 0.0319   | 0.0906   |
| IR Inten --    | 0.0083   | 1.7157   | 0.3496   |
|                | 13       | 14       | 15       |
|                | ?A       | ?A       | ?A       |
| Frequencies -- | 123.4557 | 143.2977 | 143.6728 |
| Red. masses -- | 6.2837   | 10.5832  | 7.6925   |

|                |          |          |          |
|----------------|----------|----------|----------|
| Frc consts --  | 0.0564   | 0.1280   | 0.0936   |
| IR Inten --    | 0.1451   | 0.3903   | 0.0386   |
| 16             | 17       | 18       |          |
| ?A             | ?A       | ?A       |          |
| Frequencies -- | 170.0133 | 179.1708 | 194.3377 |
| Red. masses -- | 6.3711   | 5.9019   | 5.1767   |
| Frc consts --  | 0.1085   | 0.1116   | 0.1152   |
| IR Inten --    | 3.9605   | 9.6641   | 6.4373   |
| 19             | 20       | 21       |          |
| ?A             | ?A       | ?A       |          |
| Frequencies -- | 205.5619 | 207.4953 | 224.1166 |
| Red. masses -- | 5.3237   | 5.1410   | 6.0623   |
| Frc consts --  | 0.1325   | 0.1304   | 0.1794   |
| IR Inten --    | 1.3720   | 0.2106   | 0.0096   |
| 22             | 23       | 24       |          |
| ?A             | ?A       | ?A       |          |
| Frequencies -- | 269.3379 | 271.0257 | 289.8458 |
| Red. masses -- | 5.4513   | 5.6780   | 4.0177   |
| Frc consts --  | 0.2330   | 0.2457   | 0.1989   |
| IR Inten --    | 1.1605   | 1.1258   | 23.0964  |
| 25             | 26       | 27       |          |
| ?A             | ?A       | ?A       |          |
| Frequencies -- | 291.7155 | 295.1439 | 308.4973 |
| Red. masses -- | 4.8255   | 4.9514   | 3.5712   |
| Frc consts --  | 0.2419   | 0.2541   | 0.2002   |
| IR Inten --    | 4.1931   | 3.5229   | 4.3138   |
| 28             | 29       | 30       |          |
| ?A             | ?A       | ?A       |          |
| Frequencies -- | 358.8135 | 364.1774 | 386.5865 |
| Red. masses -- | 3.6864   | 3.1696   | 6.8027   |
| Frc consts --  | 0.2796   | 0.2477   | 0.5990   |
| IR Inten --    | 24.1005  | 0.2923   | 17.8753  |
| 31             | 32       | 33       |          |
| ?A             | ?A       | ?A       |          |
| Frequencies -- | 410.9346 | 421.3298 | 427.2403 |
| Red. masses -- | 4.4162   | 3.3203   | 3.1499   |
| Frc consts --  | 0.4394   | 0.3473   | 0.3388   |
| IR Inten --    | 2.0701   | 0.1199   | 9.9174   |
| 34             | 35       | 36       |          |
| ?A             | ?A       | ?A       |          |
| Frequencies -- | 436.4524 | 485.8345 | 487.6510 |
| Red. masses -- | 4.6205   | 3.1871   | 3.2031   |
| Frc consts --  | 0.5186   | 0.4432   | 0.4488   |
| IR Inten --    | 2.8068   | 4.1802   | 0.9373   |
| 37             | 38       | 39       |          |
| ?A             | ?A       | ?A       |          |
| Frequencies -- | 543.2905 | 547.8221 | 626.4028 |
| Red. masses -- | 5.3925   | 5.6147   | 2.7374   |
| Frc consts --  | 0.9378   | 0.9928   | 0.6328   |
| IR Inten --    | 4.2179   | 5.4210   | 8.2120   |
| 40             | 41       | 42       |          |
| ?A             | ?A       | ?A       |          |

---

|                |          |          |          |
|----------------|----------|----------|----------|
| Frequencies -- | 627.2395 | 641.2868 | 642.5343 |
| Red. masses -- | 2.7526   | 5.9653   | 6.0339   |
| Frc consts --  | 0.6381   | 1.4454   | 1.4677   |
| IR Inten --    | 11.5391  | 0.0145   | 6.3286   |
|                | 43       | 44       | 45       |
|                | ?A       | ?A       | ?A       |
| Frequencies -- | 654.9589 | 656.6877 | 695.3594 |
| Red. masses -- | 5.5751   | 5.5212   | 4.4409   |
| Frc consts --  | 1.4091   | 1.4028   | 1.2651   |
| IR Inten --    | 0.2423   | 8.5948   | 0.2290   |
|                | 46       | 47       | 48       |
|                | ?A       | ?A       | ?A       |
| Frequencies -- | 697.1500 | 765.8056 | 766.7458 |
| Red. masses -- | 4.4596   | 3.7043   | 3.8273   |
| Frc consts --  | 1.2770   | 1.2800   | 1.3257   |
| IR Inten --    | 14.1171  | 3.7154   | 0.5922   |
|                | 49       | 50       | 51       |
|                | ?A       | ?A       | ?A       |
| Frequencies -- | 776.1151 | 776.5752 | 783.9695 |
| Red. masses -- | 1.2942   | 1.2944   | 1.3703   |
| Frc consts --  | 0.4593   | 0.4599   | 0.4962   |
| IR Inten --    | 91.4658  | 76.8794  | 49.6174  |
|                | 52       | 53       | 54       |
|                | ?A       | ?A       | ?A       |
| Frequencies -- | 784.2960 | 799.8515 | 803.0451 |
| Red. masses -- | 1.3754   | 3.6069   | 3.5522   |
| Frc consts --  | 0.4985   | 1.3596   | 1.3497   |
| IR Inten --    | 42.5075  | 0.9193   | 90.7101  |
|                | 55       | 56       | 57       |
|                | ?A       | ?A       | ?A       |
| Frequencies -- | 847.4617 | 848.1611 | 870.7272 |
| Red. masses -- | 1.3588   | 1.3561   | 4.0150   |
| Frc consts --  | 0.5750   | 0.5748   | 1.7935   |
| IR Inten --    | 0.7219   | 0.2553   | 2.0206   |
|                | 58       | 59       | 60       |
|                | ?A       | ?A       | ?A       |
| Frequencies -- | 871.1150 | 908.0963 | 908.8264 |
| Red. masses -- | 3.9872   | 5.1748   | 5.0471   |
| Frc consts --  | 1.7827   | 2.5142   | 2.4562   |
| IR Inten --    | 1.0576   | 0.2872   | 0.3912   |
|                | 61       | 62       | 63       |
|                | ?A       | ?A       | ?A       |
| Frequencies -- | 913.8316 | 914.1721 | 923.7304 |
| Red. masses -- | 1.3986   | 1.3916   | 1.3248   |
| Frc consts --  | 0.6881   | 0.6852   | 0.6660   |
| IR Inten --    | 0.6146   | 0.8927   | 0.7847   |
|                | 64       | 65       | 66       |
|                | ?A       | ?A       | ?A       |
| Frequencies -- | 924.3119 | 958.5565 | 958.7115 |
| Red. masses -- | 1.3255   | 1.6302   | 1.6308   |
| Frc consts --  | 0.6672   | 0.8825   | 0.8831   |
| IR Inten --    | 0.7218   | 15.3939  | 9.7937   |

---

|                |           |           |           |
|----------------|-----------|-----------|-----------|
|                | 67        | 68        | 69        |
|                | ?A        | ?A        | ?A        |
| Frequencies -- | 990.3677  | 991.2297  | 1009.3168 |
| Red. masses -- | 1.5049    | 1.4994    | 4.1386    |
| Frc consts --  | 0.8696    | 0.8680    | 2.4840    |
| IR Inten --    | 4.9901    | 0.2399    | 5.2380    |
|                | 70        | 71        | 72        |
|                | ?A        | ?A        | ?A        |
| Frequencies -- | 1009.4321 | 1011.7286 | 1013.3119 |
| Red. masses -- | 5.2407    | 2.7537    | 2.8576    |
| Frc consts --  | 3.1463    | 1.6607    | 1.7288    |
| IR Inten --    | 5.6061    | 5.7156    | 28.6303   |
|                | 73        | 74        | 75        |
|                | ?A        | ?A        | ?A        |
| Frequencies -- | 1014.6060 | 1016.5855 | 1034.8425 |
| Red. masses -- | 3.5608    | 2.4134    | 2.6145    |
| Frc consts --  | 2.1597    | 1.4695    | 1.6496    |
| IR Inten --    | 26.6214   | 20.5423   | 5.7673    |
|                | 76        | 77        | 78        |
|                | ?A        | ?A        | ?A        |
| Frequencies -- | 1035.3250 | 1040.0696 | 1040.2896 |
| Red. masses -- | 2.6040    | 1.3629    | 1.3626    |
| Frc consts --  | 1.6445    | 0.8687    | 0.8688    |
| IR Inten --    | 10.9823   | 0.2217    | 0.2344    |
|                | 79        | 80        | 81        |
|                | ?A        | ?A        | ?A        |
| Frequencies -- | 1067.3736 | 1068.2582 | 1081.2346 |
| Red. masses -- | 2.3005    | 2.2991    | 1.3115    |
| Frc consts --  | 1.5442    | 1.5458    | 0.9033    |
| IR Inten --    | 2.8657    | 3.8439    | 75.8614   |
|                | 82        | 83        | 84        |
|                | ?A        | ?A        | ?A        |
| Frequencies -- | 1082.1596 | 1119.0863 | 1121.5688 |
| Red. masses -- | 1.3331    | 2.3980    | 2.5191    |
| Frc consts --  | 0.9198    | 1.7694    | 1.8670    |
| IR Inten --    | 114.2743  | 0.2184    | 4.0613    |
|                | 85        | 86        | 87        |
|                | ?A        | ?A        | ?A        |
| Frequencies -- | 1128.1317 | 1128.2052 | 1198.3578 |
| Red. masses -- | 1.6419    | 1.6419    | 1.0967    |
| Frc consts --  | 1.2312    | 1.2313    | 0.9279    |
| IR Inten --    | 0.6216    | 5.2319    | 0.6893    |
|                | 88        | 89        | 90        |
|                | ?A        | ?A        | ?A        |
| Frequencies -- | 1198.4157 | 1222.2754 | 1223.4602 |
| Red. masses -- | 1.0965    | 1.6762    | 1.6694    |
| Frc consts --  | 0.9278    | 1.4754    | 1.4723    |
| IR Inten --    | 6.6086    | 10.6384   | 15.2017   |
|                | 91        | 92        | 93        |
|                | ?A        | ?A        | ?A        |
| Frequencies -- | 1229.2462 | 1229.7038 | 1267.4330 |
| Red. masses -- | 1.2128    | 1.2105    | 2.2080    |

|                |           |           |           |
|----------------|-----------|-----------|-----------|
| Frc consts --  | 1.0797    | 1.0785    | 2.0897    |
| IR Inten --    | 3.6613    | 0.5568    | 18.5339   |
|                | 94        | 95        | 96        |
|                | ?A        | ?A        | ?A        |
| Frequencies -- | 1267.5361 | 1289.4425 | 1289.7207 |
| Red. masses -- | 2.1778    | 3.5453    | 3.5075    |
| Frc consts --  | 2.0616    | 3.4730    | 3.4375    |
| IR Inten --    | 10.6496   | 14.4645   | 5.9745    |
|                | 97        | 98        | 99        |
|                | ?A        | ?A        | ?A        |
| Frequencies -- | 1308.0636 | 1308.2618 | 1322.7488 |
| Red. masses -- | 4.5870    | 4.4846    | 1.6225    |
| Frc consts --  | 4.6242    | 4.5224    | 1.6726    |
| IR Inten --    | 1.2603    | 2.7289    | 5.5195    |
|                | 100       | 101       | 102       |
|                | ?A        | ?A        | ?A        |
| Frequencies -- | 1323.4946 | 1367.8137 | 1368.8656 |
| Red. masses -- | 1.6188    | 1.9694    | 2.0161    |
| Frc consts --  | 1.6707    | 2.1709    | 2.2258    |
| IR Inten --    | 10.8834   | 18.6070   | 2.7868    |
|                | 103       | 104       | 105       |
|                | ?A        | ?A        | ?A        |
| Frequencies -- | 1394.1432 | 1396.1451 | 1401.2832 |
| Red. masses -- | 1.7163    | 1.6902    | 2.6892    |
| Frc consts --  | 1.9654    | 1.9412    | 3.1112    |
| IR Inten --    | 103.9653  | 198.7367  | 37.0137   |
|                | 106       | 107       | 108       |
|                | ?A        | ?A        | ?A        |
| Frequencies -- | 1402.1704 | 1436.3754 | 1437.2582 |
| Red. masses -- | 2.7275    | 2.9961    | 3.0597    |
| Frc consts --  | 3.1595    | 3.6420    | 3.7238    |
| IR Inten --    | 41.8627   | 21.6823   | 63.1620   |
|                | 109       | 110       | 111       |
|                | ?A        | ?A        | ?A        |
| Frequencies -- | 1457.9828 | 1458.4395 | 1467.0592 |
| Red. masses -- | 2.7332    | 2.7513    | 2.0652    |
| Frc consts --  | 3.4231    | 3.4479    | 2.6189    |
| IR Inten --    | 9.1301    | 72.2934   | 18.6413   |
|                | 112       | 113       | 114       |
|                | ?A        | ?A        | ?A        |
| Frequencies -- | 1467.1738 | 1493.7202 | 1494.0116 |
| Red. masses -- | 2.0482    | 1.2964    | 1.3010    |
| Frc consts --  | 2.5977    | 1.7043    | 1.7109    |
| IR Inten --    | 25.4432   | 29.2201   | 51.3118   |
|                | 115       | 116       | 117       |
|                | ?A        | ?A        | ?A        |
| Frequencies -- | 1506.5278 | 1506.6559 | 1524.5074 |
| Red. masses -- | 1.6906    | 1.6973    | 4.2901    |
| Frc consts --  | 2.2607    | 2.2700    | 5.8746    |
| IR Inten --    | 7.4567    | 13.8979   | 4.4853    |
|                | 118       | 119       | 120       |
|                | ?A        | ?A        | ?A        |

|                |           |           |           |
|----------------|-----------|-----------|-----------|
| Frequencies -- | 1524.8109 | 1609.6409 | 1610.0333 |
| Red. masses -- | 4.2974    | 5.9999    | 5.9856    |
| Frc consts --  | 5.8869    | 9.1591    | 9.1417    |
| IR Inten --    | 0.1860    | 8.2599    | 33.5161   |
|                | 121       | 122       | 123       |
|                | ?A        | ?A        | ?A        |
| Frequencies -- | 1632.4465 | 1632.4797 | 1653.1466 |
| Red. masses -- | 5.5458    | 5.5564    | 5.8053    |
| Frc consts --  | 8.7075    | 8.7244    | 9.3475    |
| IR Inten --    | 21.1183   | 10.4438   | 443.8060  |
|                | 124       | 125       | 126       |
|                | ?A        | ?A        | ?A        |
| Frequencies -- | 1654.1455 | 2980.9464 | 2981.4822 |
| Red. masses -- | 5.8087    | 1.0647    | 1.0646    |
| Frc consts --  | 9.3643    | 5.5745    | 5.5757    |
| IR Inten --    | 670.8341  | 40.3729   | 105.3515  |
|                | 127       | 128       | 129       |
|                | ?A        | ?A        | ?A        |
| Frequencies -- | 3050.9800 | 3051.2286 | 3060.7861 |
| Red. masses -- | 1.0890    | 1.0892    | 1.0929    |
| Frc consts --  | 5.9725    | 5.9745    | 6.0324    |
| IR Inten --    | 43.6619   | 14.3156   | 108.6602  |
|                | 130       | 131       | 132       |
|                | ?A        | ?A        | ?A        |
| Frequencies -- | 3061.1384 | 3204.8117 | 3204.9329 |
| Red. masses -- | 1.0927    | 1.0878    | 1.0878    |
| Frc consts --  | 6.0330    | 6.5826    | 6.5830    |
| IR Inten --    | 13.1490   | 3.9036    | 2.9861    |
|                | 133       | 134       | 135       |
|                | ?A        | ?A        | ?A        |
| Frequencies -- | 3216.6721 | 3216.8732 | 3225.2292 |
| Red. masses -- | 1.0901    | 1.0901    | 1.0961    |
| Frc consts --  | 6.6458    | 6.6466    | 6.7175    |
| IR Inten --    | 0.0770    | 0.1204    | 13.3166   |
|                | 136       | 137       | 138       |
|                | ?A        | ?A        | ?A        |
| Frequencies -- | 3225.3954 | 3242.1572 | 3242.3851 |
| Red. masses -- | 1.0961    | 1.0912    | 1.0912    |
| Frc consts --  | 6.7182    | 6.7581    | 6.7592    |
| IR Inten --    | 33.5296   | 2.7285    | 4.5287    |
|                | 139       | 140       | 141       |
|                | ?A        | ?A        | ?A        |
| Frequencies -- | 3244.0611 | 3244.1478 | 3255.6688 |
| Red. masses -- | 1.1011    | 1.1011    | 1.0945    |
| Frc consts --  | 6.8276    | 6.8277    | 6.8354    |
| IR Inten --    | 14.8183   | 31.7233   | 19.5491   |
|                | 142       | 143       | 144       |
|                | ?A        | ?A        | ?A        |
| Frequencies -- | 3255.7713 | 3282.3994 | 3282.5293 |
| Red. masses -- | 1.0945    | 1.1074    | 1.1073    |
| Frc consts --  | 6.8356    | 7.0294    | 7.0298    |
| IR Inten --    | 6.2802    | 23.2757   | 24.1321   |

---

Zero-point correction= 0.385829 (Hartree/Particle)  
 Thermal correction to Energy= 0.412794  
 Thermal correction to Enthalpy= 0.413738  
 Thermal correction to Gibbs Free Energy= 0.324621  
 Sum of electronic and zero-point Energies= -1570.721066  
 Sum of electronic and thermal Energies= -1570.694101  
 Sum of electronic and thermal Enthalpies= -1570.693157  
 Sum of electronic and thermal Free Energies= -1570.782274

|               | E (Thermal)<br>KCAL/MOL | CV<br>CAL/MOL-KELVIN | S<br>CAL/MOL-KELVIN |
|---------------|-------------------------|----------------------|---------------------|
| TOTAL         | 259.032                 | 101.298              | 187.562             |
| ELECTRONIC    | 0.000                   | 0.000                | 0.000               |
| TRANSLATIONAL | 0.889                   | 2.981                | 44.480              |
| ROTATIONAL    | 0.889                   | 2.981                | 36.220              |
| VIBRATIONAL   | 257.255                 | 95.336               | 106.862             |
| VIBRATION 1   | 0.593                   | 1.986                | 7.271               |
| VIBRATION 2   | 0.593                   | 1.986                | 7.126               |
| VIBRATION 3   | 0.593                   | 1.986                | 6.671               |
| VIBRATION 4   | 0.594                   | 1.983                | 5.570               |
| VIBRATION 5   | 0.595                   | 1.978                | 4.878               |
| VIBRATION 6   | 0.597                   | 1.974                | 4.475               |
| VIBRATION 7   | 0.599                   | 1.967                | 4.083               |
| VIBRATION 8   | 0.599                   | 1.966                | 4.013               |
| VIBRATION 9   | 0.600                   | 1.963                | 3.887               |
| VIBRATION 10  | 0.601                   | 1.959                | 3.755               |
| VIBRATION 11  | 0.604                   | 1.948                | 3.427               |
| VIBRATION 12  | 0.607                   | 1.940                | 3.234               |
| VIBRATION 13  | 0.610                   | 1.929                | 3.046               |
| VIBRATION 14  | 0.616                   | 1.910                | 2.759               |
| VIBRATION 15  | 0.616                   | 1.909                | 2.754               |
| VIBRATION 16  | 0.625                   | 1.879                | 2.435               |
| VIBRATION 17  | 0.629                   | 1.868                | 2.337               |
| VIBRATION 18  | 0.635                   | 1.848                | 2.186               |
| VIBRATION 19  | 0.640                   | 1.832                | 2.083               |
| VIBRATION 20  | 0.641                   | 1.829                | 2.066               |
| VIBRATION 21  | 0.649                   | 1.804                | 1.926               |
| VIBRATION 22  | 0.674                   | 1.730                | 1.600               |
| VIBRATION 23  | 0.675                   | 1.727                | 1.590               |
| VIBRATION 24  | 0.686                   | 1.693                | 1.475               |
| VIBRATION 25  | 0.687                   | 1.689                | 1.464               |
| VIBRATION 26  | 0.689                   | 1.683                | 1.444               |
| VIBRATION 27  | 0.698                   | 1.658                | 1.370               |
| VIBRATION 28  | 0.734                   | 1.557                | 1.127               |
| VIBRATION 29  | 0.738                   | 1.546                | 1.104               |
| VIBRATION 30  | 0.755                   | 1.499                | 1.013               |
| VIBRATION 31  | 0.775                   | 1.447                | 0.923               |
| VIBRATION 32  | 0.784                   | 1.424                | 0.887               |
| VIBRATION 33  | 0.789                   | 1.411                | 0.868               |
| VIBRATION 34  | 0.797                   | 1.391                | 0.838               |
| VIBRATION 35  | 0.842                   | 1.281                | 0.695               |

---

|              |              |             |             |
|--------------|--------------|-------------|-------------|
| VIBRATION 36 | 0.844        | 1.277       | 0.690       |
| VIBRATION 37 | 0.898        | 1.154       | 0.558       |
| VIBRATION 38 | 0.903        | 1.144       | 0.549       |
|              | Q            | LOG10(Q)    | LN(Q)       |
| TOTAL BOT    | 0.484808-149 | -149.314430 | -343.809181 |
| TOTAL V=0    | 0.142331D+29 | 28.153300   | 64.825368   |
| VIB (BOT)    | 0.611204-165 | -165.213814 | -380.418865 |
| VIB (BOT) 1  | 0.142711D+02 | 1.154459    | 2.658240    |
| VIB (BOT) 2  | 0.132668D+02 | 1.122768    | 2.585268    |
| VIB (BOT) 3  | 0.105512D+02 | 1.023304    | 2.356244    |
| VIB (BOT) 4  | 0.605432D+01 | 0.782066    | 1.800773    |
| VIB (BOT) 5  | 0.426326D+01 | 0.629742    | 1.450034    |
| VIB (BOT) 6  | 0.347391D+01 | 0.540819    | 1.245281    |
| VIB (BOT) 7  | 0.284160D+01 | 0.453563    | 1.044367    |
| VIB (BOT) 8  | 0.274117D+01 | 0.437936    | 1.008385    |
| VIB (BOT) 9  | 0.256951D+01 | 0.409851    | 0.943716    |
| VIB (BOT) 10 | 0.239941D+01 | 0.380105    | 0.875223    |
| VIB (BOT) 11 | 0.202267D+01 | 0.305925    | 0.704418    |
| VIB (BOT) 12 | 0.182767D+01 | 0.261897    | 0.603041    |
| VIB (BOT) 13 | 0.165398D+01 | 0.218529    | 0.503182    |
| VIB (BOT) 14 | 0.141771D+01 | 0.151586    | 0.349040    |
| VIB (BOT) 15 | 0.141386D+01 | 0.150406    | 0.346322    |
| VIB (BOT) 16 | 0.118536D+01 | 0.073849    | 0.170042    |
| VIB (BOT) 17 | 0.112133D+01 | 0.049732    | 0.114513    |
| VIB (BOT) 18 | 0.102822D+01 | 0.012087    | 0.027832    |
| VIB (BOT) 19 | 0.967918D+00 | -0.014161   | -0.032608   |
| VIB (BOT) 20 | 0.958169D+00 | -0.018558   | -0.042731   |
| VIB (BOT) 21 | 0.881062D+00 | -0.054993   | -0.126627   |
| VIB (BOT) 22 | 0.717789D+00 | -0.144003   | -0.331580   |
| VIB (BOT) 23 | 0.712705D+00 | -0.147090   | -0.338688   |
| VIB (BOT) 24 | 0.659835D+00 | -0.180565   | -0.415766   |
| VIB (BOT) 25 | 0.654936D+00 | -0.183801   | -0.423217   |
| VIB (BOT) 26 | 0.646106D+00 | -0.189696   | -0.436791   |
| VIB (BOT) 27 | 0.613485D+00 | -0.212196   | -0.488599   |
| VIB (BOT) 28 | 0.511230D+00 | -0.291383   | -0.670935   |
| VIB (BOT) 29 | 0.501898D+00 | -0.299384   | -0.689358   |
| VIB (BOT) 30 | 0.465535D+00 | -0.332048   | -0.764568   |
| VIB (BOT) 31 | 0.430238D+00 | -0.366292   | -0.843418   |
| VIB (BOT) 32 | 0.416329D+00 | -0.380563   | -0.876279   |
| VIB (BOT) 33 | 0.408703D+00 | -0.388592   | -0.894767   |
| VIB (BOT) 34 | 0.397201D+00 | -0.400990   | -0.923313   |
| VIB (BOT) 35 | 0.342521D+00 | -0.465312   | -1.071421   |
| VIB (BOT) 36 | 0.340708D+00 | -0.467618   | -1.076730   |
| VIB (BOT) 37 | 0.290715D+00 | -0.536533   | -1.235413   |
| VIB (BOT) 38 | 0.287067D+00 | -0.542017   | -1.248040   |
| VIB (V=0)    | 0.179439D+13 | 12.253916   | 28.215684   |
| VIB (V=0) 1  | 0.147799D+02 | 1.169672    | 2.693269    |
| VIB (V=0) 2  | 0.137763D+02 | 1.139131    | 2.622947    |
| VIB (V=0) 3  | 0.110631D+02 | 1.043876    | 2.403614    |
| VIB (V=0) 4  | 0.657494D+01 | 0.817892    | 1.883265    |
| VIB (V=0) 5  | 0.479248D+01 | 0.680560    | 1.567048    |
| VIB (V=0) 6  | 0.400971D+01 | 0.603113    | 1.388719    |



---

|               |              |          |           |
|---------------|--------------|----------|-----------|
| VIB (V=0) 7   | 0.338525D+01 | 0.529591 | 1.219429  |
| VIB (V=0) 8   | 0.328640D+01 | 0.516720 | 1.189792  |
| VIB (V=0) 9   | 0.311771D+01 | 0.493835 | 1.137098  |
| VIB (V=0) 10  | 0.295095D+01 | 0.469962 | 1.082128  |
| VIB (V=0) 11  | 0.258355D+01 | 0.412217 | 0.949165  |
| VIB (V=0) 12  | 0.239483D+01 | 0.379274 | 0.873311  |
| VIB (V=0) 13  | 0.222790D+01 | 0.347896 | 0.801059  |
| VIB (V=0) 14  | 0.200329D+01 | 0.301744 | 0.694792  |
| VIB (V=0) 15  | 0.199966D+01 | 0.300957 | 0.692979  |
| VIB (V=0) 16  | 0.178649D+01 | 0.252002 | 0.580255  |
| VIB (V=0) 17  | 0.172775D+01 | 0.237481 | 0.546821  |
| VIB (V=0) 18  | 0.164335D+01 | 0.215729 | 0.496735  |
| VIB (V=0) 19  | 0.158943D+01 | 0.201242 | 0.463378  |
| VIB (V=0) 20  | 0.158078D+01 | 0.198872 | 0.457919  |
| VIB (V=0) 21  | 0.151305D+01 | 0.179853 | 0.414128  |
| VIB (V=0) 22  | 0.137477D+01 | 0.138230 | 0.318286  |
| VIB (V=0) 23  | 0.137060D+01 | 0.136911 | 0.315250  |
| VIB (V=0) 24  | 0.132788D+01 | 0.123158 | 0.283582  |
| VIB (V=0) 25  | 0.132398D+01 | 0.121881 | 0.280642  |
| VIB (V=0) 26  | 0.131698D+01 | 0.119579 | 0.275340  |
| VIB (V=0) 27  | 0.129143D+01 | 0.111071 | 0.255751  |
| VIB (V=0) 28  | 0.121509D+01 | 0.084609 | 0.194820  |
| VIB (V=0) 29  | 0.120845D+01 | 0.082229 | 0.189339  |
| VIB (V=0) 30  | 0.118317D+01 | 0.073048 | 0.168198  |
| VIB (V=0) 31  | 0.115962D+01 | 0.064317 | 0.148096  |
| VIB (V=0) 32  | 0.115064D+01 | 0.060939 | 0.140317  |
| VIB (V=0) 33  | 0.114578D+01 | 0.059103 | 0.136090  |
| VIB (V=0) 34  | 0.113857D+01 | 0.056359 | 0.129771  |
| VIB (V=0) 35  | 0.110607D+01 | 0.043783 | 0.100813  |
| VIB (V=0) 36  | 0.110505D+01 | 0.043381 | 0.099888  |
| VIB (V=0) 37  | 0.107837D+01 | 0.032769 | 0.075453  |
| VIB (V=0) 38  | 0.107655D+01 | 0.032033 | 0.073759  |
| ELECTRONIC    | 0.100000D+01 | 0.000000 | 0.000000  |
| TRANSLATIONAL | 0.431614D+09 | 8.635096 | 19.883043 |
| ROTATIONAL    | 0.183776D+08 | 7.264288 | 16.726641 |

---

twisted alternative (optimized):

---

# b3lyp/lanl2dz guess=read freq

Charge = 0 Multiplicity = 1

|   |          |          |          |
|---|----------|----------|----------|
| 6 | 1.5277   | -0.66479 | 3.17635  |
| 6 | 0.95537  | -1.5733  | 4.12571  |
| 6 | -0.03347 | -2.30264 | 3.4384   |
| 6 | -0.02831 | -1.81121 | 2.09577  |
| 6 | -0.80292 | -2.14749 | 0.95911  |
| 6 | -1.42934 | -1.88932 | -1.35892 |
| 6 | -2.91152 | -1.55634 | -1.21404 |
| 6 | -3.90897 | -2.4671  | -1.61298 |

---

|    |          |          |          |
|----|----------|----------|----------|
| 6  | -5.26643 | -2.1283  | -1.48351 |
| 6  | -5.60405 | -0.87121 | -0.9497  |
| 6  | -4.57042 | -0.00589 | -0.56973 |
| 6  | 3.75686  | -1.97375 | -0.3504  |
| 6  | 5.10216  | -2.12085 | -0.73561 |
| 6  | 4.94925  | 0.03411  | -1.84013 |
| 6  | 3.60428  | 0.11103  | -1.41723 |
| 6  | 2.74544  | 1.26703  | -1.69725 |
| 6  | 0.68172  | 2.50825  | -1.45157 |
| 6  | 0.07975  | 3.11067  | -0.22098 |
| 6  | 0.49099  | 4.24796  | 0.4918   |
| 6  | -0.40697 | 4.3921   | 1.5966   |
| 6  | -1.32287 | 3.33429  | 1.50622  |
| 29 | 1.04485  | -0.20838 | 0.03342  |
| 29 | -1.94852 | 0.98323  | -0.10273 |
| 7  | 0.94208  | -0.80447 | 1.9603   |
| 7  | -0.61145 | -1.50269 | -0.19321 |
| 7  | -3.25202 | -0.33575 | -0.69537 |
| 7  | 3.01824  | -0.89147 | -0.69036 |
| 7  | 1.56166  | 1.33075  | -1.15157 |
| 7  | -1.03402 | 2.54658  | 0.39775  |
| 1  | 2.30951  | 0.06522  | 3.34479  |
| 1  | 1.23147  | -1.66502 | 5.16833  |
| 1  | -0.67696 | -3.07646 | 3.83926  |
| 1  | -1.55632 | -2.93885 | 1.0543   |
| 1  | -1.34226 | -2.96534 | -1.58182 |
| 1  | -1.03451 | -1.35164 | -2.23093 |
| 1  | -3.61392 | -3.43133 | -2.0157  |
| 1  | -6.04069 | -2.82752 | -1.78704 |
| 1  | -6.63717 | -0.56361 | -0.82695 |
| 1  | -4.78227 | 0.97545  | -0.15888 |
| 1  | 3.25235  | -2.72817 | 0.24626  |
| 1  | 5.65563  | -3.00892 | -0.44636 |
| 1  | 5.3852   | 0.84949  | -2.41157 |
| 1  | 3.13241  | 2.05735  | -2.34769 |
| 1  | 1.24944  | 3.26946  | -2.0082  |
| 1  | -0.11272 | 2.12781  | -2.11268 |
| 1  | 1.32844  | 4.88943  | 0.24409  |
| 1  | -0.3909  | 5.16495  | 2.35427  |
| 1  | -2.15054 | 3.09729  | 2.1627   |
| 6  | 5.7059   | -1.09817 | -1.49801 |
| 1  | 6.74382  | -1.18141 | -1.80873 |

Full point group            C1    NOp 1

116 alpha electrons    116 beta electrons

SCF Done: E(RB+HF-LYP) = -1571.07955175    A.U. after 3 cycles  
 Conv = 0.7801D-08            -V/T = 2.1014  
 S\*\*2 = 0.0000

Total atomic charges:

---

1  
1 C -0.278106  
2 C -0.284810  
3 C -0.407882  
4 C 0.373426  
5 C -0.218014  
6 C -0.463495  
7 C 0.310439  
8 C -0.336738  
9 C -0.163694  
10 C -0.189422  
11 C -0.152404  
12 C -0.263834  
13 C -0.175816  
14 C -0.279779  
15 C 0.279927  
16 C -0.235678  
17 C -0.487752  
18 C 0.384083  
19 C -0.434293  
20 C -0.309853  
21 C -0.219836  
22 Cu 0.414761  
23 Cu 0.358100  
24 N -0.325535  
25 N -0.245699  
26 N -0.276738  
27 N -0.163290  
28 N -0.166041  
29 N -0.416625  
30 H 0.227078  
31 H 0.229175  
32 H 0.231650  
33 H 0.223377  
34 H 0.205511  
35 H 0.234499  
36 H 0.245466  
37 H 0.244261  
38 H 0.242043  
39 H 0.250552  
40 H 0.251447  
41 H 0.231956  
42 H 0.231972  
43 H 0.228528  
44 H 0.192981  
45 H 0.215347  
46 H 0.224101  
47 H 0.220714  
48 H 0.200146  
49 C -0.192194  
50 H 0.235989  
Sum of Mulliken charges= 0.00000

Low frequencies --- -3.0824 -0.0005 -0.0002 0.0006 1.2528 6.0910 Low frequencies ---  
 13.3953 27.6184 31.2558

Harmonic frequencies (cm<sup>-1</sup>), IR intensities (KM/Mole),  
 Raman scattering activities (A<sup>4</sup>/AMU), Raman depolarization ratios,  
 reduced masses (AMU), force constants (mDyne/A) and normal coordinates:

|                | 1        | 2        | 3        |
|----------------|----------|----------|----------|
|                | ?A       | ?A       | ?A       |
| Frequencies -- | 13.2168  | 27.6074  | 31.1600  |
| Red. masses -- | 5.8971   | 6.1296   | 5.9986   |
| Frc consts --  | 0.0006   | 0.0028   | 0.0034   |
| IR Inten --    | 1.4690   | 0.7223   | 0.4400   |
|                | 4        | 5        | 6        |
|                | ?A       | ?A       | ?A       |
| Frequencies -- | 34.5671  | 42.5312  | 47.8155  |
| Red. masses -- | 5.4636   | 6.2729   | 5.2984   |
| Frc consts --  | 0.0038   | 0.0067   | 0.0071   |
| IR Inten --    | 1.1329   | 0.5842   | 0.7237   |
|                | 7        | 8        | 9        |
|                | ?A       | ?A       | ?A       |
| Frequencies -- | 65.7354  | 78.9172  | 85.5562  |
| Red. masses -- | 5.4228   | 6.9443   | 5.8566   |
| Frc consts --  | 0.0138   | 0.0255   | 0.0253   |
| IR Inten --    | 0.8794   | 0.9245   | 0.2776   |
|                | 10       | 11       | 12       |
|                | ?A       | ?A       | ?A       |
| Frequencies -- | 90.9139  | 111.6643 | 115.0475 |
| Red. masses -- | 5.5378   | 6.0691   | 5.6790   |
| Frc consts --  | 0.0270   | 0.0446   | 0.0443   |
| IR Inten --    | 0.0796   | 0.9263   | 0.8510   |
|                | 13       | 14       | 15       |
|                | ?A       | ?A       | ?A       |
| Frequencies -- | 117.1137 | 144.7177 | 154.4844 |
| Red. masses -- | 8.4142   | 5.6173   | 6.2919   |
| Frc consts --  | 0.0680   | 0.0693   | 0.0885   |
| IR Inten --    | 0.8430   | 4.2587   | 5.5069   |
|                | 16       | 17       | 18       |
|                | ?A       | ?A       | ?A       |
| Frequencies -- | 162.1540 | 176.1516 | 189.3643 |
| Red. masses -- | 6.0634   | 5.7250   | 7.3749   |
| Frc consts --  | 0.0939   | 0.1047   | 0.1558   |
| IR Inten --    | 4.0657   | 1.2416   | 3.4916   |
|                | 19       | 20       | 21       |
|                | ?A       | ?A       | ?A       |
| Frequencies -- | 212.1883 | 219.8271 | 231.7023 |
| Red. masses -- | 5.0234   | 5.4914   | 4.6422   |
| Frc consts --  | 0.1333   | 0.1563   | 0.1468   |
| IR Inten --    | 0.0076   | 2.3995   | 8.2500   |

Zero-point vibrational energy 1013759.5 (Joules/Mol)  
 242.29434 (kcal/Mol)

---

Zero-point correction= 0.386121 (Hartree/Particle)  
 Thermal correction to Energy= 0.412841  
 Thermal correction to Enthalpy= 0.413785  
 Thermal correction to Gibbs Free Energy= 0.325725  
 Sum of electronic and zero-point Energies= -1570.693431  
 Sum of electronic and thermal Energies= -1570.666711  
 Sum of electronic and thermal Enthalpies= -1570.665767  
 Sum of electronic and thermal Free Energies= -1570.753827

|               | E (Thermal)<br>KCAL/MOL | CV<br>CAL/MOL-KELVIN | S<br>CAL/MOL-KELVIN |
|---------------|-------------------------|----------------------|---------------------|
| TOTAL         | 259.062                 | 101.103              | 185.338             |
| ELECTRONIC    | 0.000                   | 0.000                | 0.000               |
| TRANSLATIONAL | 0.889                   | 2.981                | 44.480              |
| ROTATIONAL    | 0.889                   | 2.981                | 36.408              |
| VIBRATIONAL   | 257.284                 | 95.141               | 104.450             |
| VIBRATION 1   | 0.593                   | 1.987                | 7.457               |
| VIBRATION 2   | 0.593                   | 1.984                | 5.994               |
| VIBRATION 3   | 0.594                   | 1.983                | 5.754               |
| VIBRATION 4   | 0.594                   | 1.983                | 5.548               |
| VIBRATION 5   | 0.595                   | 1.980                | 5.138               |
| VIBRATION 6   | 0.595                   | 1.978                | 4.906               |
| VIBRATION 7   | 0.597                   | 1.971                | 4.277               |
| VIBRATION 8   | 0.600                   | 1.963                | 3.918               |
| VIBRATION 9   | 0.601                   | 1.959                | 3.759               |
| VIBRATION 10  | 0.602                   | 1.956                | 3.640               |
| VIBRATION 11  | 0.607                   | 1.940                | 3.240               |
| VIBRATION 12  | 0.608                   | 1.937                | 3.182               |
| VIBRATION 13  | 0.608                   | 1.935                | 3.147               |
| VIBRATION 14  | 0.616                   | 1.908                | 2.741               |
| VIBRATION 15  | 0.620                   | 1.898                | 2.616               |
| VIBRATION 16  | 0.622                   | 1.889                | 2.525               |
| VIBRATION 17  | 0.628                   | 1.872                | 2.369               |
| VIBRATION 18  | 0.633                   | 1.855                | 2.234               |
| VIBRATION 19  | 0.643                   | 1.822                | 2.025               |
| VIBRATION 20  | 0.647                   | 1.811                | 1.961               |
| VIBRATION 21  | 0.653                   | 1.793                | 1.866               |
| VIBRATION 22  | 0.669                   | 1.743                | 1.652               |
| VIBRATION 23  | 0.679                   | 1.714                | 1.546               |
| VIBRATION 24  | 0.696                   | 1.664                | 1.389               |
| VIBRATION 25  | 0.697                   | 1.661                | 1.380               |
| VIBRATION 26  | 0.706                   | 1.634                | 1.306               |
| VIBRATION 27  | 0.724                   | 1.584                | 1.185               |
| VIBRATION 28  | 0.732                   | 1.562                | 1.137               |
| VIBRATION 29  | 0.747                   | 1.520                | 1.052               |
| VIBRATION 30  | 0.760                   | 1.487                | 0.991               |
| VIBRATION 31  | 0.793                   | 1.401                | 0.853               |
| VIBRATION 32  | 0.800                   | 1.384                | 0.828               |
| VIBRATION 33  | 0.807                   | 1.365                | 0.801               |
| VIBRATION 34  | 0.817                   | 1.342                | 0.770               |
| VIBRATION 35  | 0.832                   | 1.304                | 0.722               |
| VIBRATION 36  | 0.865                   | 1.228                | 0.634               |

---

|              |       |       |       |
|--------------|-------|-------|-------|
| VIBRATION 37 | 0.890 | 1.172 | 0.575 |
| VIBRATION 38 | 0.892 | 1.169 | 0.572 |
| VIBRATION 39 | 0.980 | 0.989 | 0.416 |

|              | Q            | LOG10(Q)    | LN(Q)       |
|--------------|--------------|-------------|-------------|
| TOTAL BOT    | 0.150626-149 | -149.822099 | -344.978132 |
| TOTAL V=0    | 0.602348D+28 | 27.779847   | 63.965462   |
| VIB (BOT)    | 0.172751-165 | -165.762579 | -381.682444 |
| VIB (BOT) 1  | 0.156763D+02 | 1.195242    | 2.752147    |
| VIB (BOT) 2  | 0.750063D+01 | 0.875098    | 2.014987    |
| VIB (BOT) 3  | 0.664412D+01 | 0.822437    | 1.893732    |
| VIB (BOT) 4  | 0.598794D+01 | 0.777278    | 1.789748    |
| VIB (BOT) 5  | 0.486378D+01 | 0.686974    | 1.581817    |
| VIB (BOT) 6  | 0.432427D+01 | 0.635913    | 1.464243    |
| VIB (BOT) 7  | 0.313925D+01 | 0.496825    | 1.143983    |
| VIB (BOT) 8  | 0.261006D+01 | 0.416651    | 0.959374    |
| VIB (BOT) 9  | 0.240498D+01 | 0.381112    | 0.877543    |
| VIB (BOT) 10 | 0.226118D+01 | 0.354336    | 0.815889    |
| VIB (BOT) 11 | 0.183353D+01 | 0.263288    | 0.606243    |
| VIB (BOT) 12 | 0.177829D+01 | 0.250003    | 0.575654    |
| VIB (BOT) 13 | 0.174611D+01 | 0.242072    | 0.557391    |
| VIB (BOT) 14 | 0.140324D+01 | 0.147133    | 0.338785    |
| VIB (BOT) 15 | 0.131084D+01 | 0.117549    | 0.270666    |
| VIB (BOT) 16 | 0.124593D+01 | 0.095492    | 0.219879    |
| VIB (BOT) 17 | 0.114172D+01 | 0.057560    | 0.132536    |
| VIB (BOT) 18 | 0.105716D+01 | 0.024139    | 0.055582    |
| VIB (BOT) 19 | 0.935218D+00 | -0.029087   | -0.066976   |
| VIB (BOT) 20 | 0.899885D+00 | -0.045813   | -0.105488   |
| VIB (BOT) 21 | 0.849419D+00 | -0.070878   | -0.163203   |
| VIB (BOT) 22 | 0.742271D+00 | -0.129437   | -0.298040   |
| VIB (BOT) 23 | 0.692426D+00 | -0.159627   | -0.367554   |
| VIB (BOT) 24 | 0.621419D+00 | -0.206615   | -0.475750   |
| VIB (BOT) 25 | 0.617833D+00 | -0.209129   | -0.481537   |
| VIB (BOT) 26 | 0.585487D+00 | -0.232483   | -0.535311   |
| VIB (BOT) 27 | 0.534853D+00 | -0.271766   | -0.625764   |
| VIB (BOT) 28 | 0.515062D+00 | -0.288140   | -0.663467   |
| VIB (BOT) 29 | 0.481036D+00 | -0.317823   | -0.731814   |
| VIB (BOT) 30 | 0.456790D+00 | -0.340283   | -0.783532   |
| VIB (BOT) 31 | 0.402904D+00 | -0.394798   | -0.909056   |
| VIB (BOT) 32 | 0.393418D+00 | -0.405146   | -0.932882   |
| VIB (BOT) 33 | 0.383019D+00 | -0.416780   | -0.959672   |
| VIB (BOT) 34 | 0.371227D+00 | -0.430360   | -0.990940   |
| VIB (BOT) 35 | 0.352926D+00 | -0.452317   | -1.041498   |
| VIB (BOT) 36 | 0.319367D+00 | -0.495709   | -1.141413   |
| VIB (BOT) 37 | 0.297285D+00 | -0.526827   | -1.213063   |
| VIB (BOT) 38 | 0.296045D+00 | -0.528643   | -1.217244   |
| VIB (BOT) 39 | 0.235813D+00 | -0.627432   | -1.444716   |
| VIB (V=0)    | 0.690823D+12 | 11.839367   | 27.261150   |
| VIB (V=0) 1  | 0.161842D+02 | 1.209092    | 2.784037    |
| VIB (V=0) 2  | 0.801728D+01 | 0.904027    | 2.081599    |
| VIB (V=0) 3  | 0.716290D+01 | 0.855089    | 1.968916    |
| VIB (V=0) 4  | 0.650878D+01 | 0.813500    | 1.873152    |

---

|               |              |          |           |
|---------------|--------------|----------|-----------|
| VIB (V=0) 5   | 0.538942D+01 | 0.731542 | 1.684437  |
| VIB (V=0) 6   | 0.485308D+01 | 0.686017 | 1.579613  |
| VIB (V=0) 7   | 0.367882D+01 | 0.565708 | 1.302591  |
| VIB (V=0) 8   | 0.315752D+01 | 0.499346 | 1.149788  |
| VIB (V=0) 9   | 0.295641D+01 | 0.470764 | 1.083975  |
| VIB (V=0) 10  | 0.281581D+01 | 0.449603 | 1.035248  |
| VIB (V=0) 11  | 0.240048D+01 | 0.380298 | 0.875669  |
| VIB (V=0) 12  | 0.234725D+01 | 0.370559 | 0.853244  |
| VIB (V=0) 13  | 0.231629D+01 | 0.364793 | 0.839966  |
| VIB (V=0) 14  | 0.198966D+01 | 0.298779 | 0.687964  |
| VIB (V=0) 15  | 0.190296D+01 | 0.279429 | 0.643410  |
| VIB (V=0) 16  | 0.184251D+01 | 0.265410 | 0.611128  |
| VIB (V=0) 17  | 0.174640D+01 | 0.242145 | 0.557559  |
| VIB (V=0) 18  | 0.166944D+01 | 0.222570 | 0.512485  |
| VIB (V=0) 19  | 0.156049D+01 | 0.193260 | 0.444998  |
| VIB (V=0) 20  | 0.152946D+01 | 0.184539 | 0.424916  |
| VIB (V=0) 21  | 0.148565D+01 | 0.171917 | 0.395854  |
| VIB (V=0) 22  | 0.139497D+01 | 0.144564 | 0.332871  |
| VIB (V=0) 23  | 0.135408D+01 | 0.131645 | 0.303123  |
| VIB (V=0) 24  | 0.129760D+01 | 0.113140 | 0.260514  |
| VIB (V=0) 25  | 0.129481D+01 | 0.112205 | 0.258361  |
| VIB (V=0) 26  | 0.126993D+01 | 0.103780 | 0.238963  |
| VIB (V=0) 27  | 0.123217D+01 | 0.090669 | 0.208774  |
| VIB (V=0) 28  | 0.121784D+01 | 0.085589 | 0.197076  |
| VIB (V=0) 29  | 0.119383D+01 | 0.076941 | 0.177164  |
| VIB (V=0) 30  | 0.117724D+01 | 0.070866 | 0.163175  |
| VIB (V=0) 31  | 0.114213D+01 | 0.057716 | 0.132896  |
| VIB (V=0) 32  | 0.113622D+01 | 0.055463 | 0.127708  |
| VIB (V=0) 33  | 0.112984D+01 | 0.053018 | 0.122079  |
| VIB (V=0) 34  | 0.112274D+01 | 0.050281 | 0.115775  |
| VIB (V=0) 35  | 0.111201D+01 | 0.046109 | 0.106169  |
| VIB (V=0) 36  | 0.109329D+01 | 0.038736 | 0.089193  |
| VIB (V=0) 37  | 0.108170D+01 | 0.034108 | 0.078537  |
| VIB (V=0) 38  | 0.108107D+01 | 0.033854 | 0.077951  |
| VIB (V=0) 39  | 0.105282D+01 | 0.022353 | 0.051470  |
| ELECTRONIC    | 0.100000D+01 | 0.000000 | 0.000000  |
| TRANSLATIONAL | 0.431614D+09 | 8.635096 | 19.883043 |
| ROTATIONAL    | 0.202015D+08 | 7.305384 | 16.821269 |

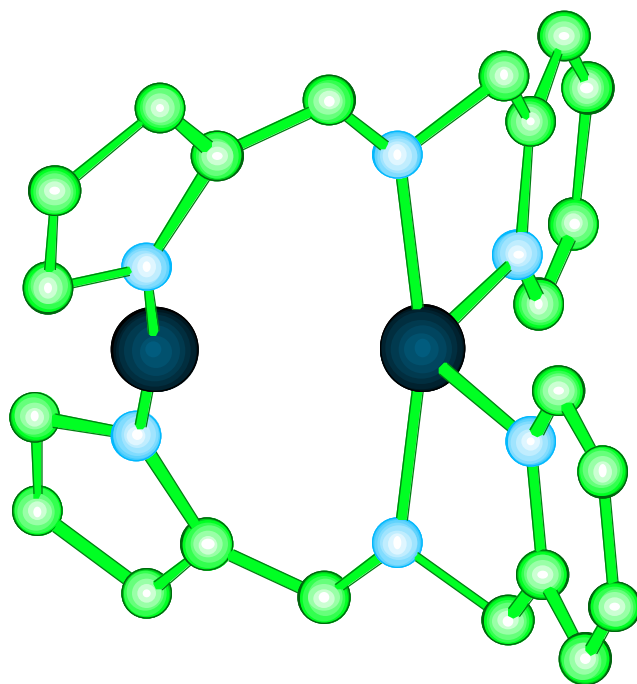

Full optimized geometry of conformer **2**

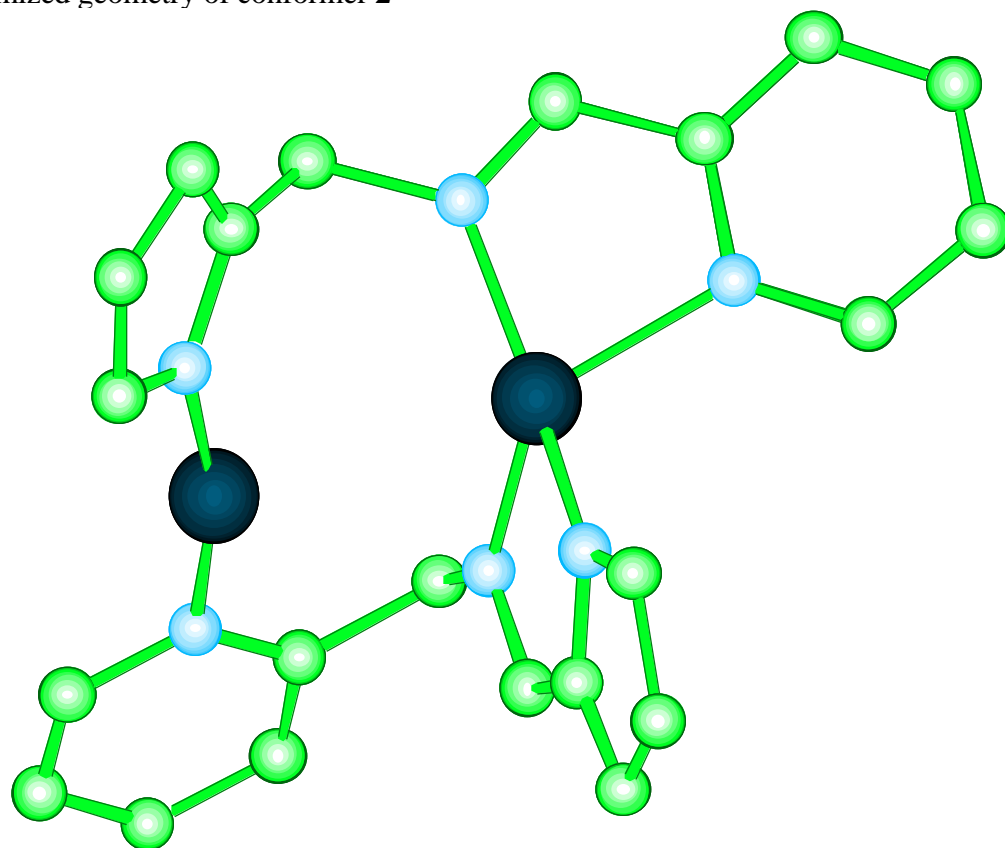

Full optimized geometry of conformer **3**



## Synthesis and Structure of an Asymmetric Copper(I) dimer with Two-coordinate and Four-coordinate Copper(I) Sites

Yi Liao, Juan J. Novoa, Atta Arif, and Joel S. Miller\*

An asymmetric copper(I) dimer with both two- and four-coordinate copper(I) sites was synthesized and studied by X-ray diffraction and DFT calculations and shown to be more stable than the symmetric form.

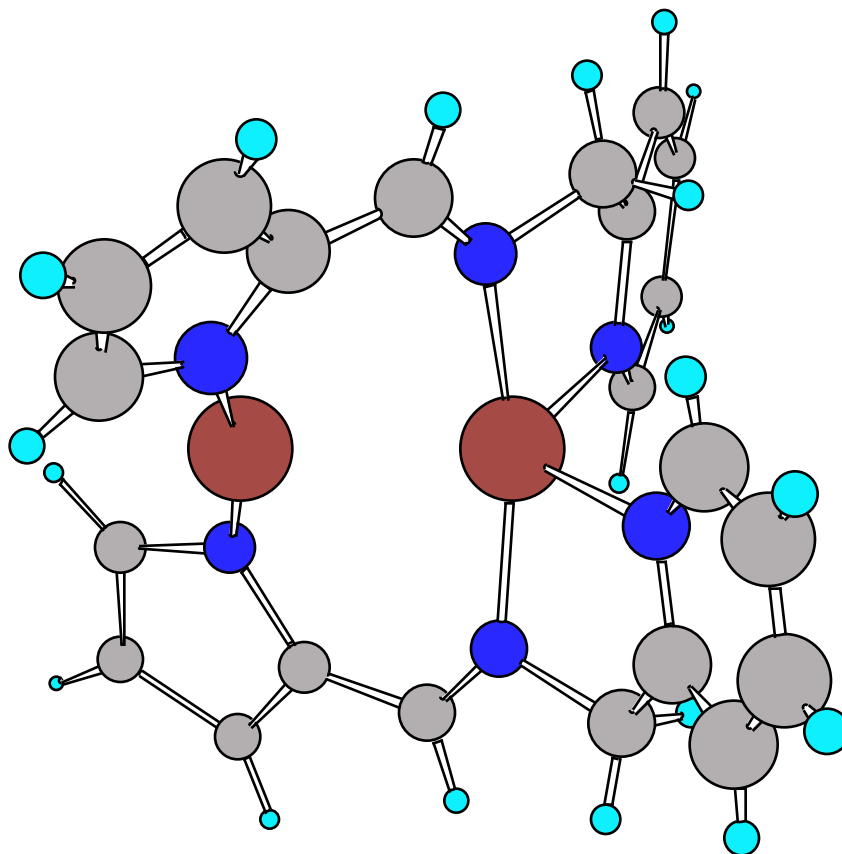

Supplement: b208865g.pdf [file b208865g.pdf]
